# Supplementary material
Source: PubMed Central journal article supplement (PMC4165463)
Supplement: ac501526n_si_001.pdf [file ac501526n_si_001.pdf]

## Supporting Information

### Cross-Linking Electrochemical Mass Spectrometry for Probing Protein Three-Dimensional Structures

Qiuling Zheng,<sup>1</sup> Hao Zhang<sup>2\*</sup>, Lingying Tong,<sup>1,3</sup> Shiyong Wu<sup>1,3</sup> and Hao Chen<sup>1,3\*</sup>

<sup>1</sup>*Center for Intelligent Chemical Instrumentation, Department of Chemistry and Biochemistry,* <sup>3</sup>*Edison Biotechnology Institute, Ohio University, Athens, OH, USA 45701,*

<sup>2</sup>*Department of Chemistry, Washington University, St. Louis, MO, USA 63130*

#### *Table of content*

1. Schemes showing the reduction of DSP cross-linked products and the experimental apparatus
2. Detailed DSP cross-linking experimental procedure
3. Tables
4. Additional DESI-MS and MS/MS data

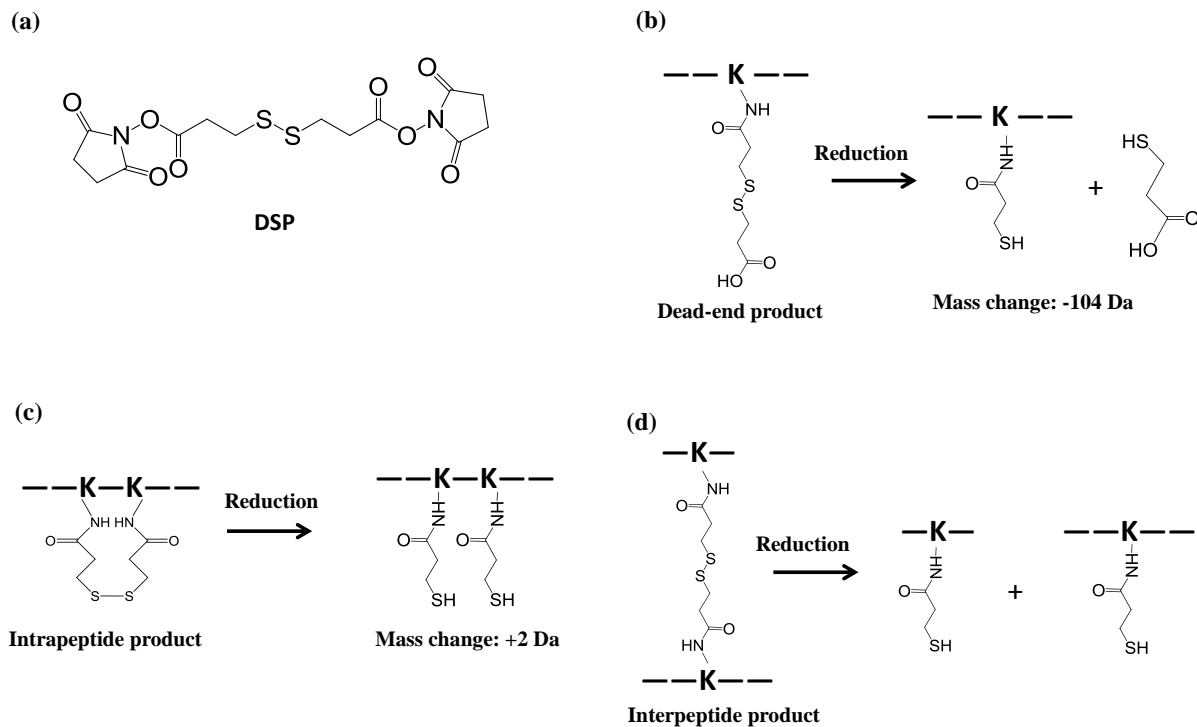

**Scheme S-1.** (a) Structure of DSP; possible cross-linking reaction products and their conversion upon electrochemical reduction: (b) dead-end cross-linked product, (c) intrapeptide cross-linked product and (d) interpeptide product.

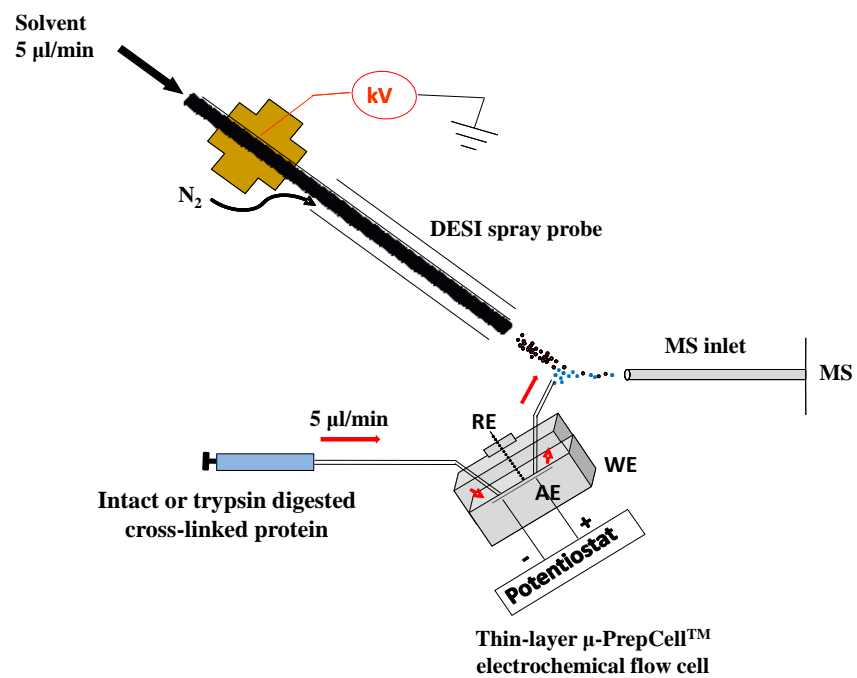

**Scheme S-2.** Schematic showing the apparatus of online electrolytic reduction and online MS analysis of cross-linked products in mixture

## **Detailed DSP cross-linking experimental procedure**

### ***Peptide HCKFWW***

A 100  $\mu\text{L}$  of aqueous peptide solution (100  $\mu\text{M}$ ) was mixed with 1  $\mu\text{L}$  of 10 mM DSP in DMSO and reacted for 1 h at room temperature. Then, 250 mM  $\text{NH}_4\text{HCO}_3$  was used to quench the reaction. C18 Ziptip was used for purifying and enriching the modified peptide which was dissolved in  $\text{MeOH:H}_2\text{O}$  (3:2 by volume) containing 0.1% FA to a final concentration of 20  $\mu\text{M}$  for EC/DESI-MS analysis.

### ***Insulin***

A 200  $\mu\text{L}$  of 100  $\mu\text{M}$  insulin in 10 mM PBS (pH 7.4) and 20  $\mu\text{L}$  of 10 mM DSP in DMSO were mixed and reacted for 1 h at room temperature. Then, 250 mM  $\text{NH}_4\text{HCO}_3$  was used to quench the reaction. The resulting mixture solution was desalted using a 5000 molecular weight cutoff filter. The desalted protein was re-dissolved in  $\text{MeOH:H}_2\text{O}$  (1:1 by volume) containing 1% FA to a final concentration of 20  $\mu\text{M}$ , and was subject to EC/DESI-MS analysis.

To cross-link denatured insulin, 100  $\mu\text{L}$  of 100  $\mu\text{M}$  insulin in 1% formic acid was first mixed with 50  $\mu\text{L}$  of 8 M urea for denaturation. The mixture was desalted via centrifugation to remove excess amount of urea by using a 3000 Da molecular weight cutoff filter and re-dissolved in 100  $\mu\text{L}$  of  $\text{H}_2\text{O}$ . A 20  $\mu\text{L}$  of 10 mM DSP in DMSO was added and reacted for 1 h at room temperature. The resulting mixture solution was desalted using a 5000 molecular weight cutoff filter and the desalted protein was re-dissolved in  $\text{MeOH:H}_2\text{O}$  (1:1 by volume) containing 1% FA to a final concentration of 20  $\mu\text{M}$  for EC/DESI-MS analysis.

### ***Ubiquitin***

A 600  $\mu\text{L}$  of 200  $\mu\text{M}$  ubiquitin solution in 10 mM PBS buffer (pH 7.4) and 120  $\mu\text{L}$  of 10 mM DSP in DMSO were mixed and reacted for 1 h at room temperature. Then, 250 mM  $\text{NH}_4\text{HCO}_3$  was used to quench the reaction. The resulting mixture solution was desalted using a

5000 molecular weight cutoff filter and was re-dissolved in 25 mM  $\text{NH}_4\text{HCO}_3$ . A 24  $\mu\text{L}$  of 200  $\mu\text{M}$  trypsin was added (protein:enzyme=25:1) for overnight digestion. The C18 Ziptip was used for further sample desalting. The desalted protein was re-dissolved in  $\text{MeOH:H}_2\text{O}$  (1:1 by volume) containing 1% FA for EC/DESI-MS analysis to a final concentration of 20  $\mu\text{M}$ , before EC/DESI-MS analysis.

### ***Calmodulin-Melittin complex***

A 3 mL of 20  $\mu\text{M}$  of calmodulin and melittin in  $\text{CaCl}_2$  (80  $\mu\text{M}$  in PBS, pH 7.4) and 120  $\mu\text{L}$  of 10 mM DSP in DMSO were mixed and reacted for 1 h at room temperature. Then, 250 mM  $\text{NH}_4\text{HCO}_3$  was used to quench the reaction. The resulting mixture solution was desalted using a 5000 molecular weight cutoff filter. Then the sample was re-dissolved in 25 mM  $\text{NH}_4\text{HCO}_3$  and 12  $\mu\text{L}$  of 200  $\mu\text{M}$  trypsin was added (protein:enzyme=25:1) for overnight digestion. C18 Ziptip was used for purifying and the mixture was re-dissolved in  $\text{MeOH:H}_2\text{O}$  (3:2 by volume) containing 0.1% FA to a final concentration of 20  $\mu\text{M}$  for EC/DESI-MS analysis.

## Tables

**Table S-1.** Relative intensity changes of peptide ions after electrolysis (using the peak of the disulfide-free peptide ion [HCK<sup>3</sup>FWW+2H]<sup>2+</sup> as the reference)

| Peptide | Peptide ions          | <i>m/z</i> | Relative intensity before reduction (%) | Relative intensity after reduction (%) | Relative change of relative intensity (%) |
|---------|-----------------------|------------|-----------------------------------------|----------------------------------------|-------------------------------------------|
| HCKFWW  | [P1+2H] <sup>2+</sup> | 540.7      | 171.80                                  | 64.47                                  | -62                                       |
|         | [P2+2H] <sup>2+</sup> | 549.7      | 42.77                                   | 26.91                                  | -37                                       |

**Table S-2.** Solvent accessibilities of N termini and lysine residue of insulin\*

| Residue | Position     | Total | Apolar | Backbone | Sidechain | Ratio (%) | In/Out |
|---------|--------------|-------|--------|----------|-----------|-----------|--------|
| G       | 1 (A Chain)  | 58.3  | 27.3   | 58.3     | 0.0       | 66.9      | Out    |
| F       | 1 (B Chain)  | 163.7 | 132.3  | 54.3     | 109.4     | 60.7      | Out    |
| K       | 29 (B Chain) | 16.2  | 0.0    | 16.2     | 0.0       | 0.0       | In     |

\*Solvent accessibility data was obtained by using online software GETAREA 1.1 for protein surface area calculation and insulin crystal data file (“1APH.pbd”) downloaded from Protein Data Bank.

**Table S-3.** Relative intensity changes of peptide ions after electrolysis (using the peak of the disulfide-free peptide [LGEDNINVVEGNEQFISASK+2H]<sup>2+</sup> as the reference)

| Protein   | Peptide ions                                 | <i>m/z</i> | Relative intensity before reduction (%) | Relative intensity after reduction (%) | Relative change of relative intensity (%) |
|-----------|----------------------------------------------|------------|-----------------------------------------|----------------------------------------|-------------------------------------------|
| Ubiquitin | <b>1</b> [P3+2H] <sup>2+</sup>               | 769.8      | 3389.7                                  | 1175.68                                | <b>-65</b>                                |
|           | <b>2</b> [P4+3H] <sup>3+</sup>               | 775.0      | 166.2                                   | 109.46                                 | <b>-34</b>                                |
|           | <b>3</b> [TITLEVEPSDTIENVK+2H] <sup>2+</sup> | 894.4      | 214.0                                   | 198.65                                 | -7                                        |
|           | <b>4</b> [P5+2H] <sup>2+</sup>               | 948.9      | 160.3                                   | 93.24                                  | <b>-42</b>                                |
|           | <b>6</b> [P6+3H] <sup>3+</sup>               | 1217.2     | 14.9                                    | 0.00                                   | <b>-100</b>                               |

**Table S-4.** Relative intensity changes of peptide ions after electrolysis (using the peak of the disulfide-free peptide [VLTTGLPALISWIK+2H]<sup>2+</sup> as the reference)

| Complex             | Peptide ions                                       | <i>m/z</i> | Relative intensity before reduction (%) | Relative intensity after reduction (%) | Relative change of relative intensity (%) |
|---------------------|----------------------------------------------------|------------|-----------------------------------------|----------------------------------------|-------------------------------------------|
| Calmodulin-Melittin | <b>1</b> [P7+3H] <sup>3+</sup>                     | 744.7      | 1.65                                    | 1.03                                   | <b>-38</b>                                |
|                     | <b>3</b> [HVMTNLGEKLTDEEVDEMIR+3H] <sup>3+</sup>   | 787.4      | 8.72                                    | 8.28                                   | -5                                        |
|                     | <b>4</b> [P8+H] <sup>+</sup>                       | 849.4      | 28.92                                   | 14.95                                  | <b>-48</b>                                |
|                     | <b>5</b> [P9+2H] <sup>2+</sup>                     | 930.5      | 35.76                                   | 14.24                                  | <b>-60</b>                                |
|                     | <b>6</b> [P10+2H] <sup>2+</sup>                    | 974.4      | 50.35                                   | 23.20                                  | <b>-54</b>                                |
|                     | <b>7</b> [EADIDGDGQVNYEEFVQMMTAK+2H] <sup>2+</sup> | 1246.0     | 11.67                                   | 9.90                                   | -15                                       |
|                     | <b>8</b> [VLTTGLPALISW+H] <sup>+</sup>             | 1270.7     | 9.24                                    | 9.49                                   | 3                                         |

Additional DESI-MS and MS/MS data

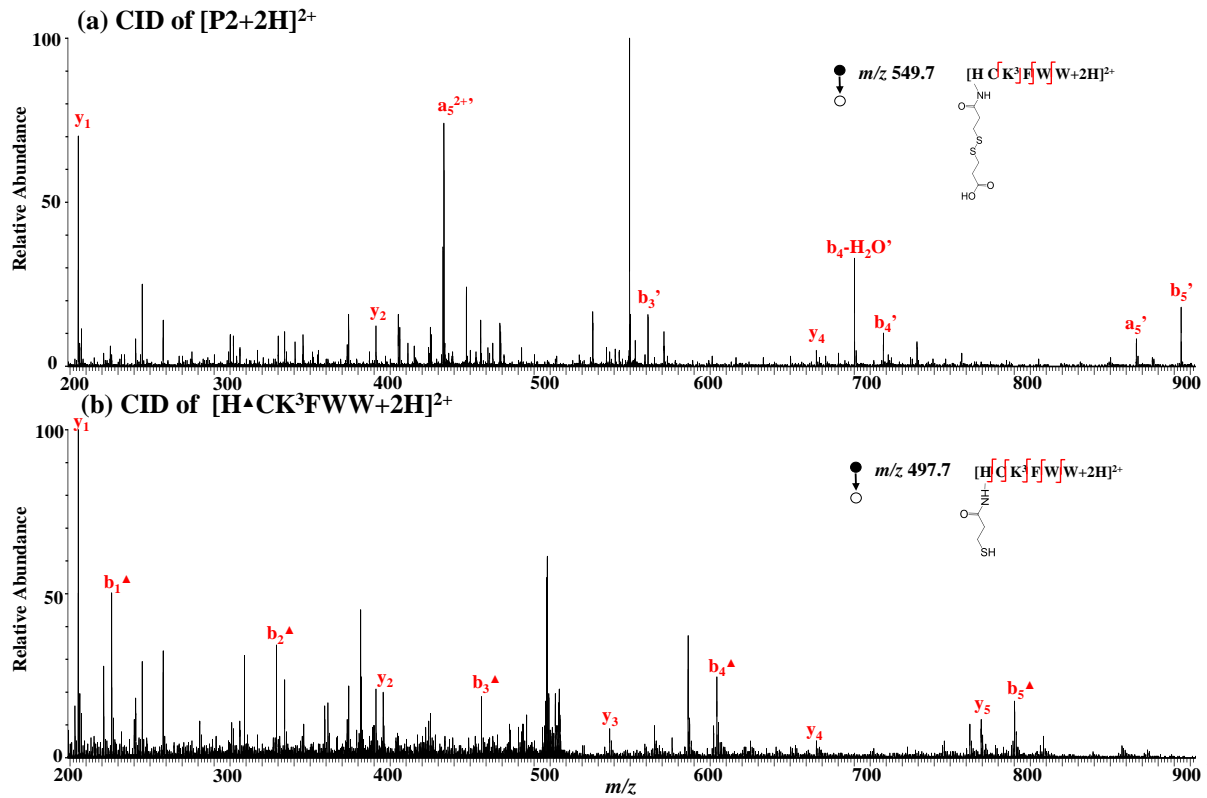

**Figure S-1.** CID MS/MS spectra of (a)  $[P2+2H]^{2+}$  ( $m/z$  549.7); and (b)  $[H^{\blacktriangle}CK^3FWW+2H]^{2+}$  ( $m/z$  497.7). The symbol ' denotes a dead-end tag of  $-C(O)CH_2CH_2SSCH_2CH_2COOH$  and  $\blacktriangle$  denotes one reduced tag of  $-C(O)CH_2CH_2SH$ .

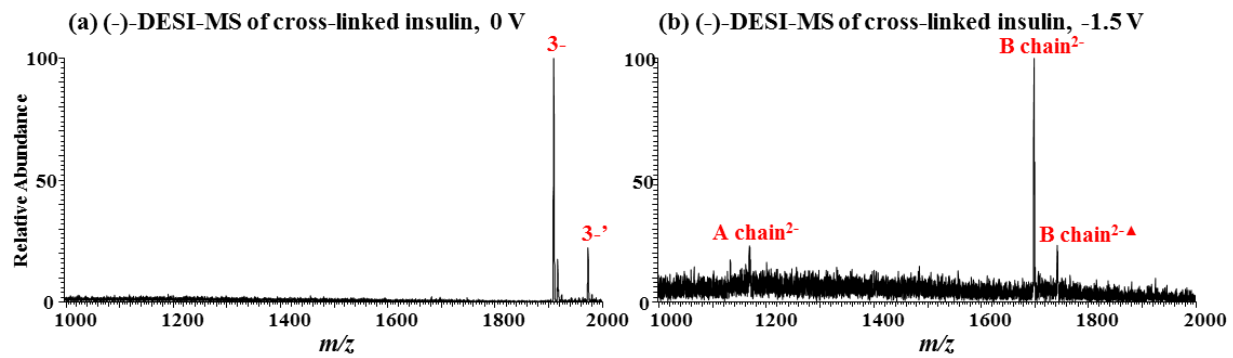

**Figure S-2.** (-)-DESI-MS spectra of cross-linked insulin (a) before and (b) after electrochemical reduction (applied potential: -1.5 V).



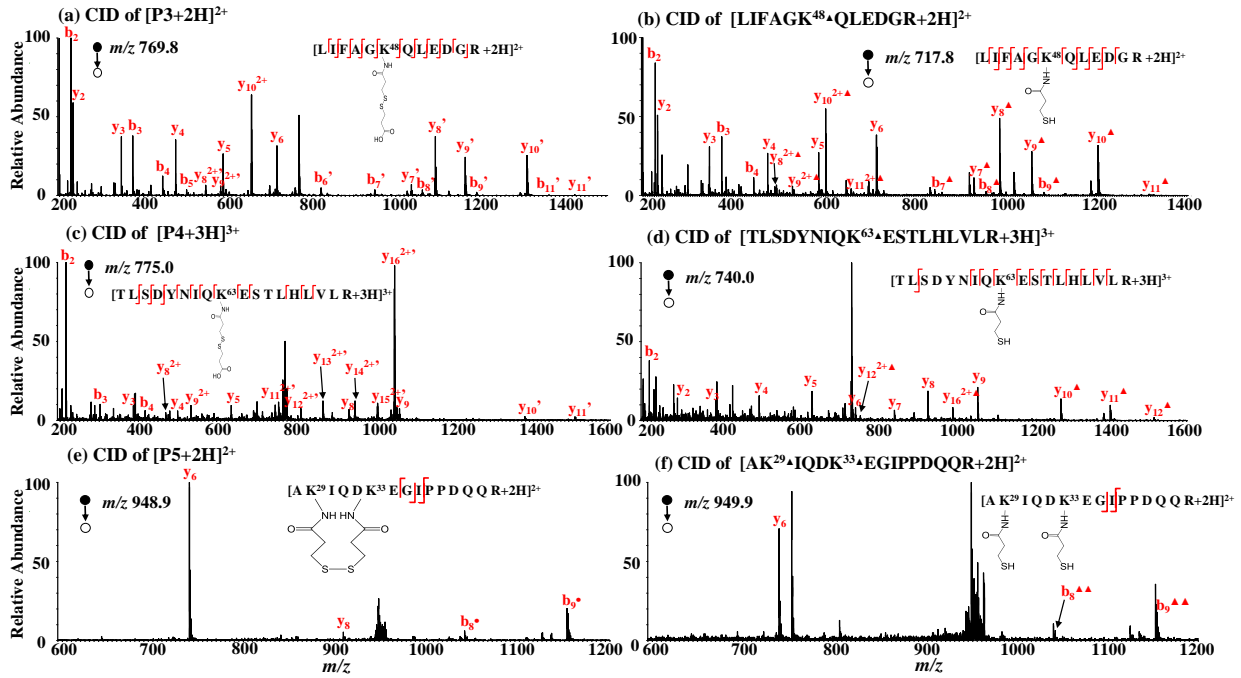

**Figure S-3.** CID MS/MS spectra of (a)  $[P3+2H]^{2+}$  ( $m/z$  769.8), (b)  $[LIFAGK^{48}\Delta QLEDGR+2H]^{2+}$  ( $m/z$  717.8); (c)  $[P4+EH]^{3+}$  ( $m/z$  775.0) (d)  $[T LSDYNIQK^{63}\Delta ESTLHLVLR+3H]^{3+}$  ( $m/z$  740.0); (e)  $[P5+2H]^{2+}$  ( $m/z$  948.9); and (f)  $[AK^{29}\Delta IQDK^{33}\Delta EGIPPDQQR+2H]^{2+}$  ( $m/z$  949.9).

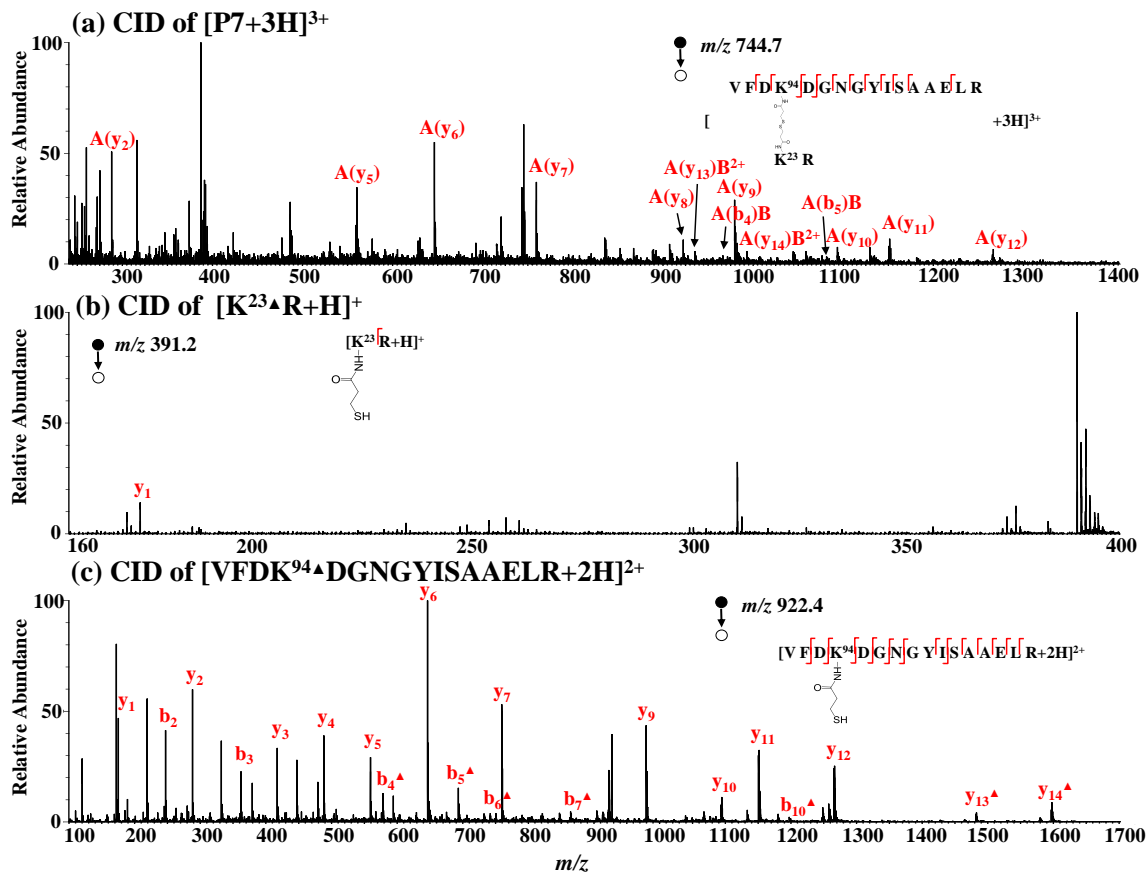

**Figure S-4.** CID MS/MS spectra of (a)  $[P7+3H]^{3+}$  ( $m/z$  744.7); (b)  $[K^{23}R+H]^+$  ( $m/z$  391.2); (c)  $[VFDK^{94}DGNGYISAAELR+2H]^{2+}$  ( $m/z$  922.4).

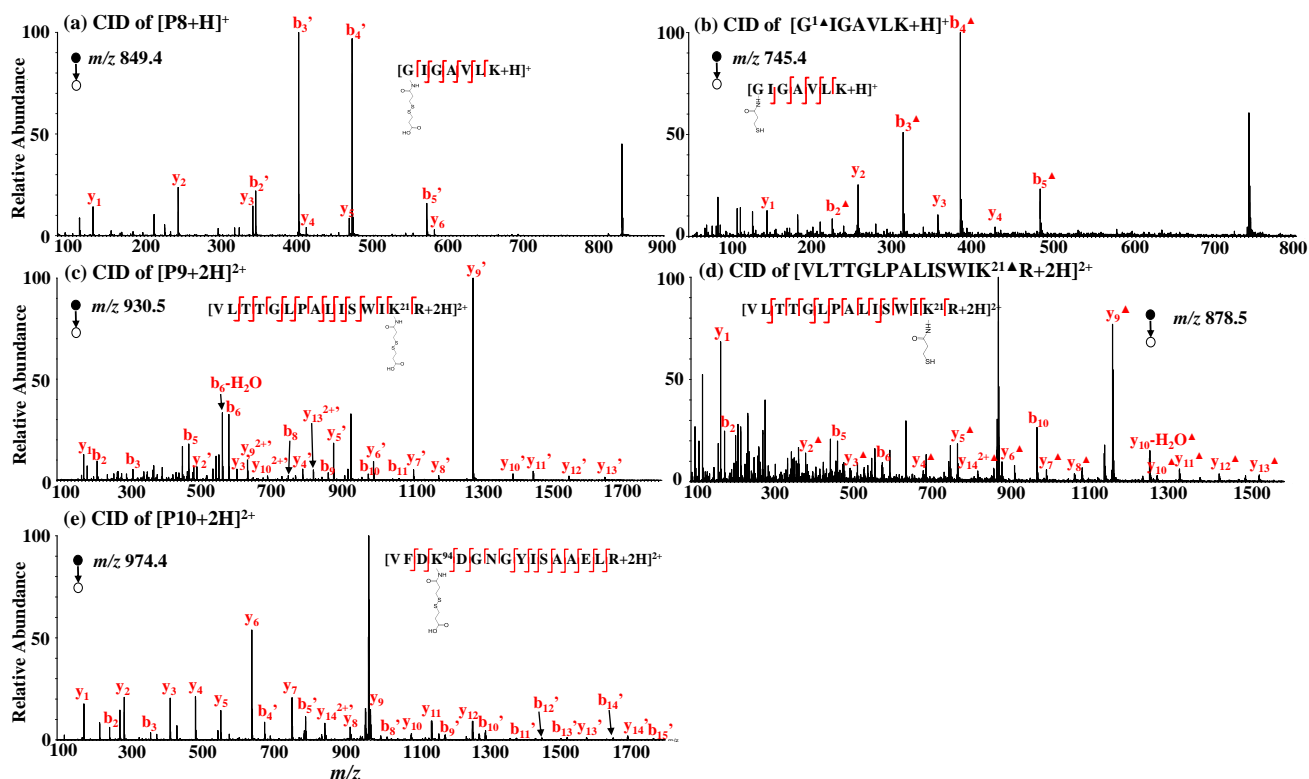

**Figure S-5.** CID MS/MS spectra of (a)  $[P8+H]^+$  ( $m/z$  849.4); and (b)  $[G^{1\Delta}IGAVLK+H]^+$  ( $m/z$  745.4), (c)  $[P9+2H]^{2+}$  ( $m/z$  930.5), (d)  $[VLTTGLPALISWIK^{21\Delta}R+2H]^{2+}$  ( $m/z$  878.5), and (e)  $[P10+2H]^{2+}$  ( $m/z$  974.4).

CID of  $[VLTTGLPALISWIK^{21\Delta}R+2H]^{2+}$  ( $m/z$  878.5) (Figure S-5d) produced  $y_1^\Delta$ ,  $y_2^\Delta$ ,  $y_3^\Delta$ ,  $y_4^\Delta$ ,  $y_5^\Delta$ ,  $y_6^\Delta$ ,  $y_7^\Delta$ ,  $y_8^\Delta$ ,  $y_9^\Delta$ ,  $y_{10-H_2O}^\Delta$ ,  $y_{10}^\Delta$ ,  $y_{11}^\Delta$ ,  $y_{12}^\Delta$ ,  $y_{13}^\Delta$ ,  $y_{14}^{2+\Delta}$ ,  $b_2$ ,  $b_5$ ,  $b_6$ , and  $b_{10}$ , covering the majority of backbone cleavages and locating the modification position at  $K^{21}$ . P9 (measured mass: 1859.0 Da, see the structure of P9 in Figure 5a inset) is considered as the dead-end cross-link precursor because the mass difference between P9 and its reduced product VLTTGLPALISWIK<sup>21</sup>ΔR (measured mass: 1755.0 Da) is 104.0 Da. The structure P9 is confirmed by CID of  $[P9+2H]^{2+}$  ( $m/z$  930.5), as shown in Figure S-5c. For P10 (measured mass: 1946.8 Da), it is assigned as the dead-end cross-link of VFDK<sup>94</sup>DGNGYISAAELR (see the structure of P10 in Figure 5a inset), because of the 104.0 Da mass difference between P10 and

the reduced product VFDK<sup>94</sup>▲DGNGYISAAELR (measured mass: 1842.8 Da). Upon CID, [P10+2H]<sup>2+</sup> (*m/z* 974.4) yielded *y*<sub>1</sub>, *y*<sub>2</sub>, *y*<sub>3</sub>, *y*<sub>4</sub>, *y*<sub>5</sub>, *y*<sub>6</sub>, *y*<sub>7</sub>, *y*<sub>8</sub>, *y*<sub>9</sub>, *y*<sub>10</sub>, *y*<sub>11</sub>, *y*<sub>12</sub>, *y*<sub>13</sub>', *y*<sub>14</sub>', *y*<sub>14</sub>'<sup>2+</sup>, *b*<sub>2</sub>, *b*<sub>3</sub>, *b*<sub>4</sub>', *b*<sub>5</sub>', *b*<sub>8</sub>', *b*<sub>9</sub>', *b*<sub>10</sub>', *b*<sub>11</sub>', *b*<sub>12</sub>', *b*<sub>13</sub>', *b*<sub>14</sub>', and *b*<sub>15</sub>', providing evidence for this assignment (Figure S-5e).
